# Supplementary material for: Extracellular Superoxide Dismutase (EC-SOD) Regulates Gene Methylation and Cardiac Fibrosis During Chronic Hypoxic Stress
Source: PubMed Central journal article supplement (PMC8202000; doi:10.3389/fcvm.2021.669975), 2021-05-31

# Supplement # 1

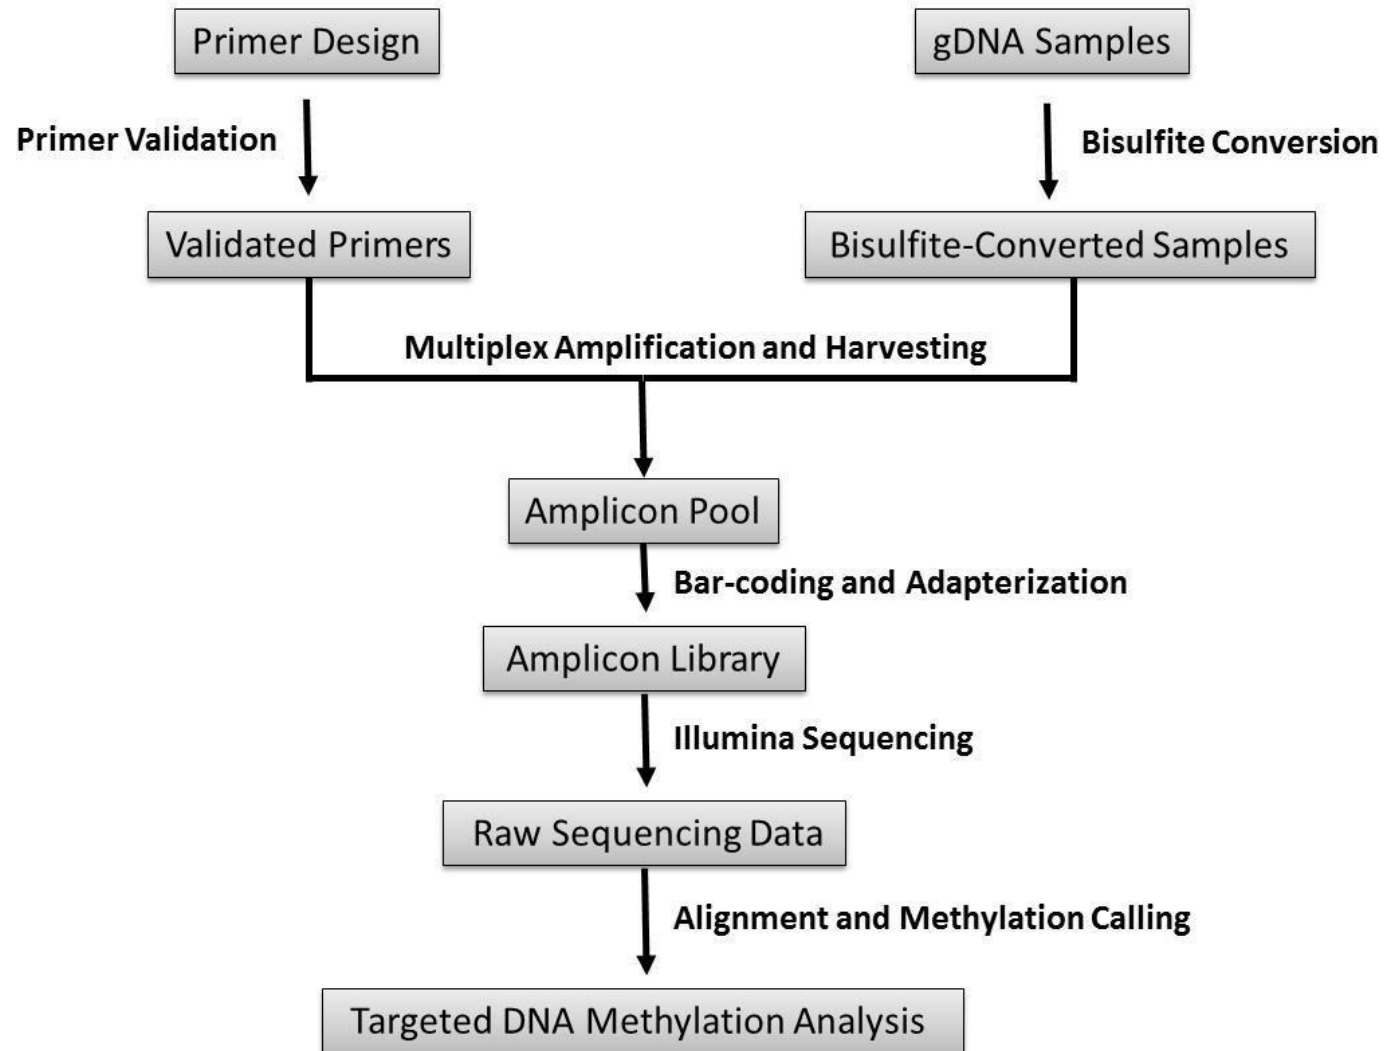

# Supplement # 2

```
CGGCATCCGGTGGGCTCCTTCTCCTCCCCAGGCAAGCTGCAGCATTGAGAGTGGCCGATGGCAGACGGTGGC
CCCCTCAGAGCAGCAAAAGCTGAATAAACTGGATGGGCAAGTATGGATCGCCCTGTACAATCTACTGCTCAGCCC
TGAGGCCCGAGCCCGTTACTGCCTTACAAGCTTTGCCAAGGGACAGCTGCTTAAGGTGGAGAACTCAATGACCCC
GCCAGCCCCACTGCCCCCTGCCAGACCCACCCCCAGGGCATCCTGGCCTGTCCCTGTCCCCTTTCCACAAC
TTGGGCTTCAGGCATCGACAGGGGAGCTGGTAAGATGCAAACCCTCCAAGGAAGCTCAGCCCAATTTTCAGGACTT
CCTGTCTCTTGGCCCTCTGGCTAGGAACAGTTAGTTTCTCAATGGCCTTCCCTGGATCTCTTGCAGCTTCAGGCC
TTCCTCACTGACACACTACTCGACCAGTTGCCCAATCTTGCAGATCTGAAGGGTTTCTGGCCCACCTGTCCCTG
GCTGAAACCCAGCCCCCTAAGAAGGACCTAGTGTTAGAACAGGTAAGGCCCTAGAACATGCTTGGGAGTGCTTGG
GACGGTGGTCCACTTTTCGGCTCCTTCCCTGTCTCCATTACACTTTTTTAGATCCCAGAAATCTGGGATCG
CCTGGAGAGAGAGAACAAGGGAAATGGCAGGCTATCGCCAAGCACCAGCTTCAGCAAGTATTCAGCCTCTCGGA
GAAGGATCTTCGTCAACAAGCACAGAGGTAAGTCCACTGAGTGGCTGAAGTACCGTGCATAGGACCAAGGAGGG
AAGGTCACCTAGTGCTTCTGTGCACCTACCTGCCCGGTCCGTCCATTACAGCTCTTCTCGACTCCTCCCCAGGTG
GGCTGAAACCTACAGGCTGGATGTCCTAGAGGCAGTAGCTCCGGAGAGGCCCGCTGCGGCTACTGCAACCGCAGA
GGCCTCCAAGCGCTGCTCCAGATGCCAGAATGTGTGGTATTGCTGCAGGTGAGGCGATCCTGGGACCTTAGTTGC
CCCCCTAAGCTCCAACCCTGGGTTCTCCTACAACCCTGTGATGTCATGCAACCCACCCCGCTGCAGGGAGTGT
CAAGTCAAGCACTGGGAGAAGCACGGAAAGACATGTGTTCTAGCAGCCCAAGGTGACAGAGCCAAGTGAAGGCCG
TAGCTGCCGAGGGCCGACAGAAGAGCGCACCCAGACTGTGACTGAGCTTCAGGGACTCGTGGCTCGCCCCTGTCA
GACCTCAATTTCCCTGGTGGTGGTGGTGGTGGTGGTGGTGGTGGTGGTGGTGGTGGTGGTGGTGGTGGTGGTGGT
CCCAGCGAATACGCAGAGGACCAGGCCACAGCATCAGCAAACCTGGCAGACAGGGTGGGGGGTGTAAAGCAAGGGC
CGGATGTGGAGACCTCTTCCCTTTCCGACATAAAGCAGACTCATGAAACCGCAACAGTGTGGCGCTGTACAGTCA
TCCTTGGGGTGGGGGAGAAGACTGGACGGAAAGATTGGGAAGGGGCTCTTTGAAAGGGCCACCCCTGTGCGT
GCCC CGCCACAAGTCCACA CGGT CGGCT CGCCTAGGGTTCCAGCGCGTCCCTCCTCGGCTCTTTCCCGCCGCT
GCCTGGATCCTGGGGGCGGTGCCGAAGTCCGCGGCCCGCCCTGCGGCCTCGCCCGCTCGGTACTCACTAGCTGCTA
GTCCGCTACAGCACCGGCCTGACCGGGCCATGTGGCGGAGCCAGAACTCATTGAACTACGCGAGCTGGCACCGT
CCGGGCGCATCGGTCCAGGCCTGACCGGCTGGAGCGTGCCTGCGCATCGCCCGGGTACAACACGCA
ATCCGTCACAGCAGCACGTCCCGGGTCTGGCCACCGTTTCCAGCCTGCAGGGCCACCACGCACACGTGGTGCG
ACCTCTGTGGAGACTTCATCTGGGGCGTCTGCGCAAGGGCCTACAGTGC
```

Small Letters = Repeat Sequences; Capital Letters = Unique Sequence; Dark Gray= Regions not covered by Targeted Sequencing Amplicons, Light Gray= Regions of Interest; CG= CG of interest >mm10. DNA range=chr9:107549843-107551842 5'pad=0 3'pad=0 Estimated No. of amplicons: 8.

# Supplement # 3A

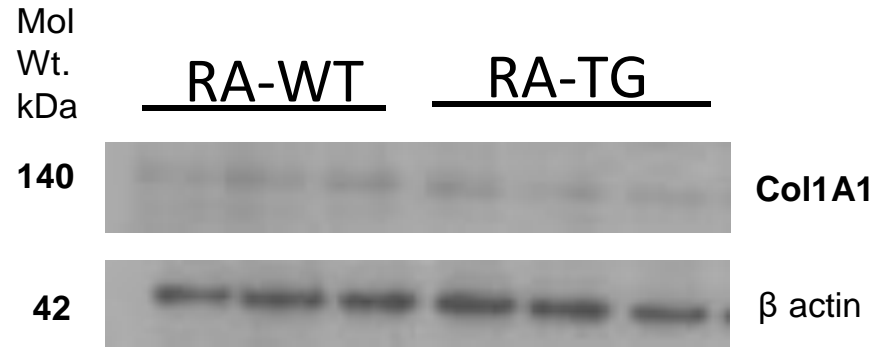

## Collagen 1 (Col1A1)

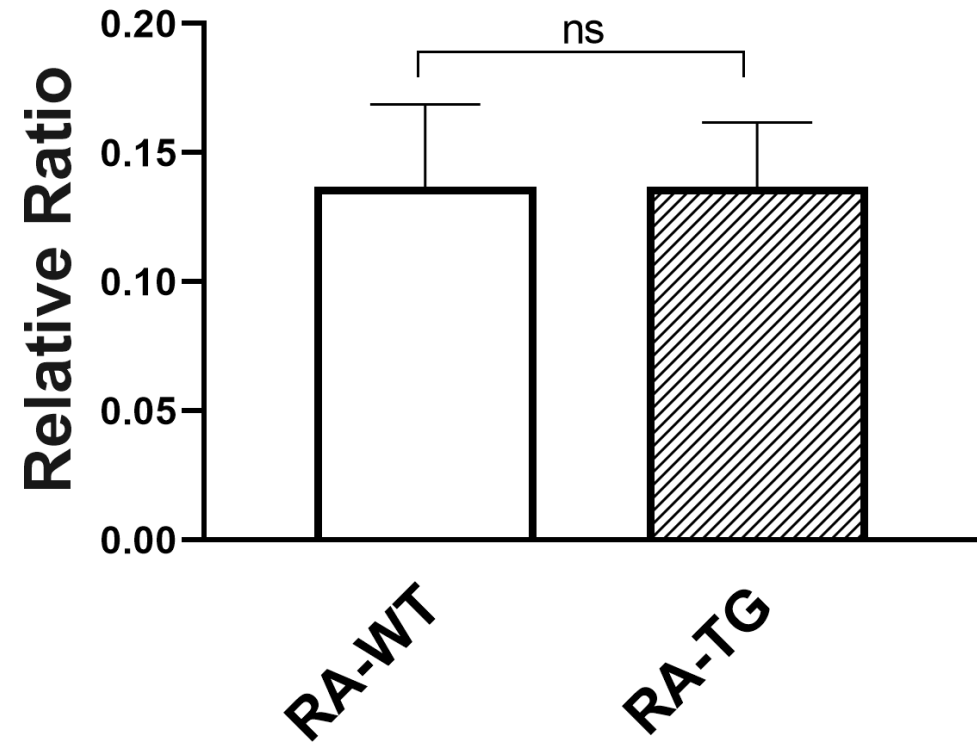

# Supplement # 3B

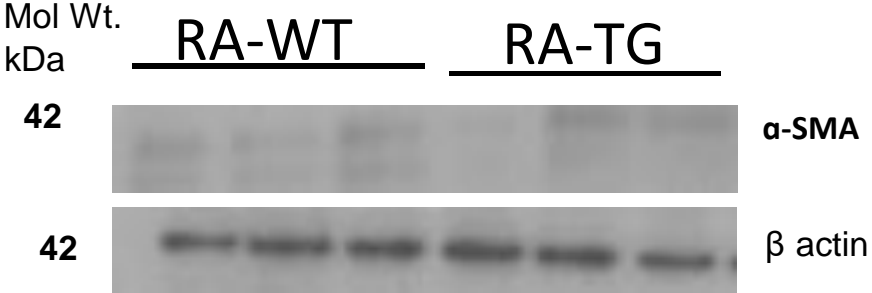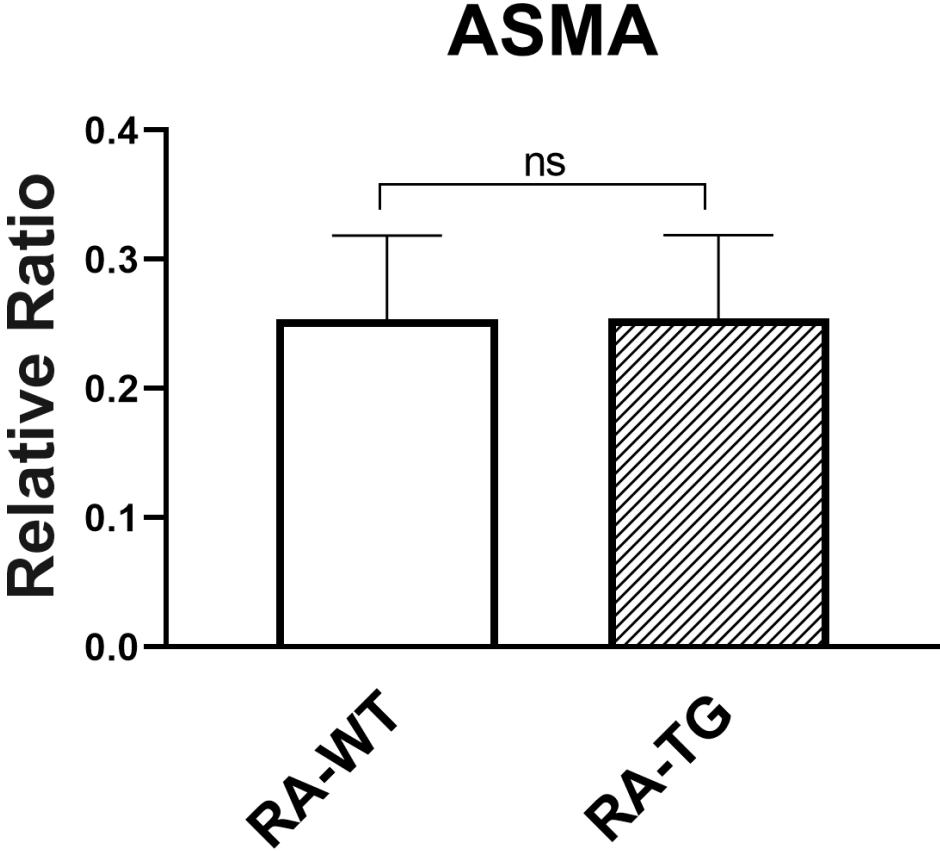

# Supplement # 3C

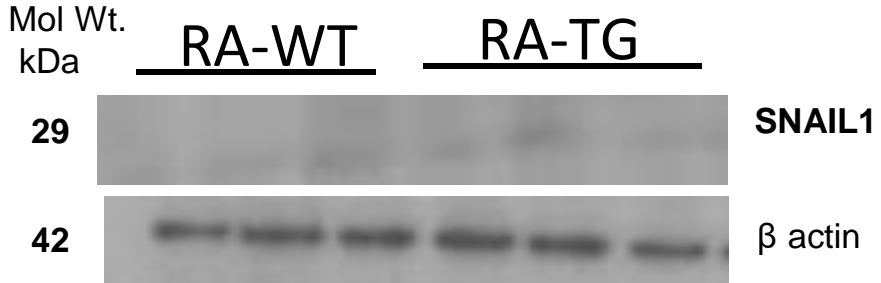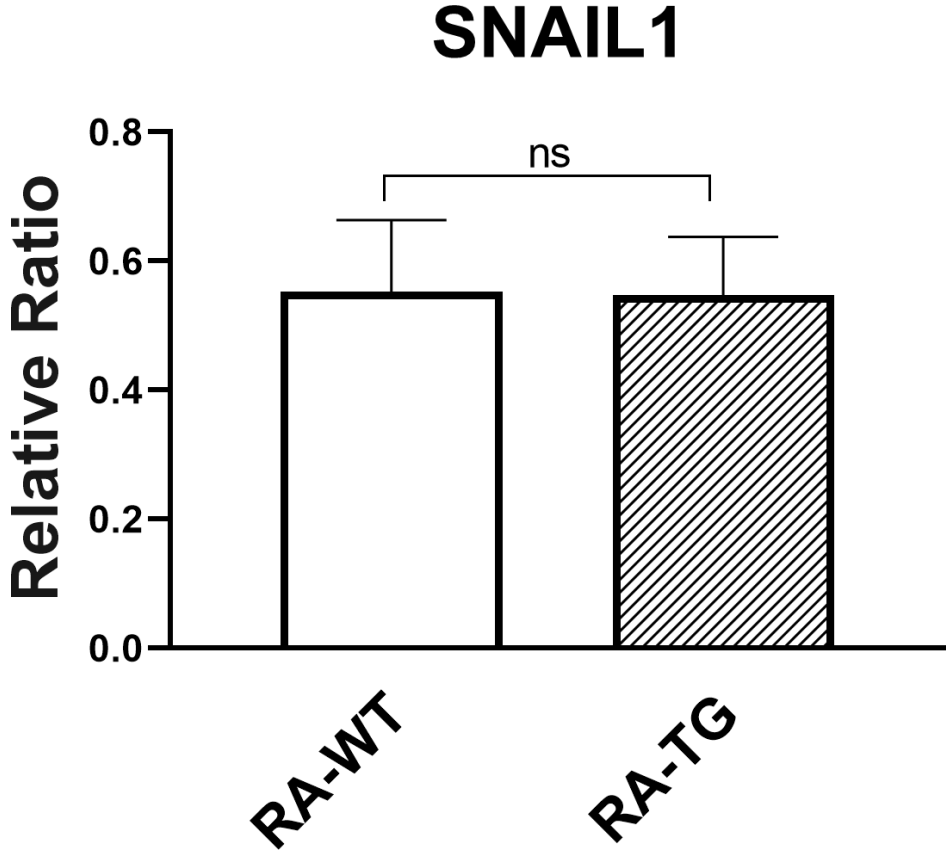

# Supplement # 3D

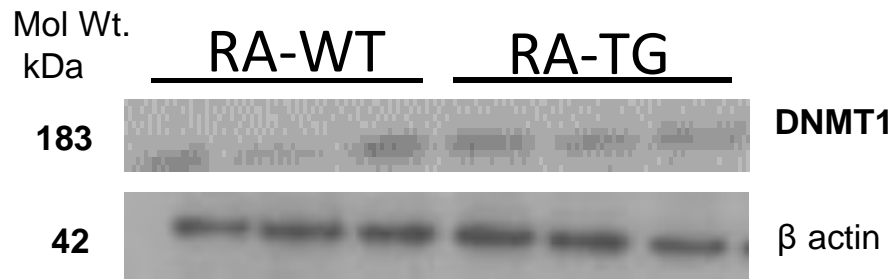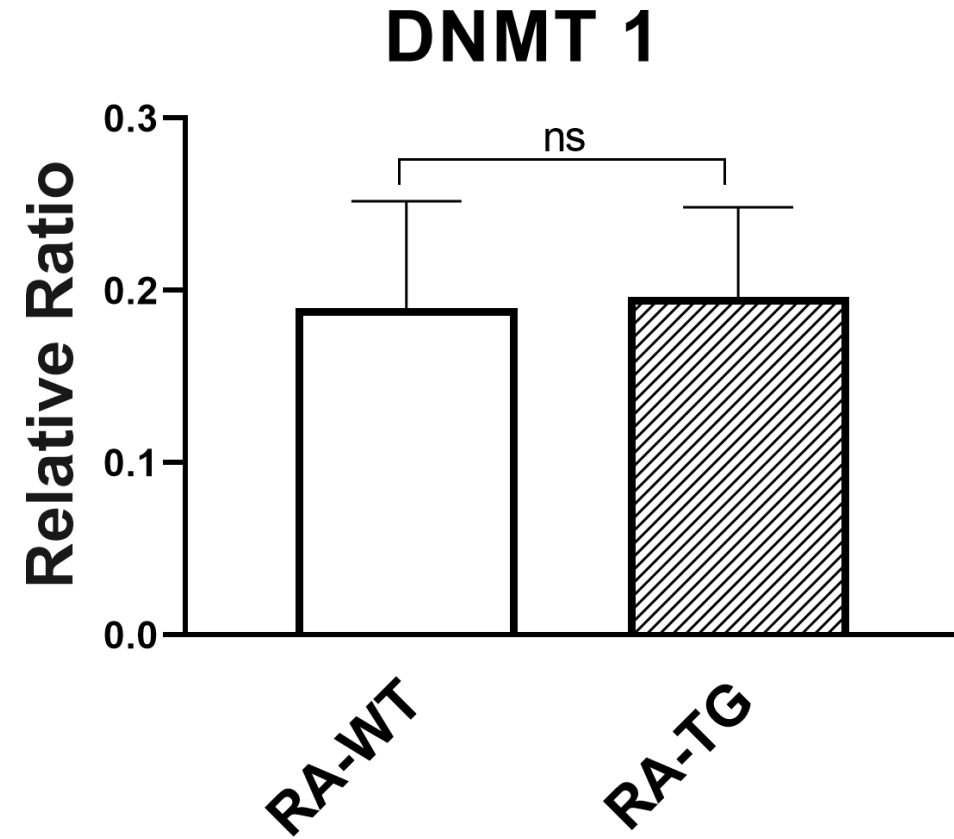

# Supplement # 3E

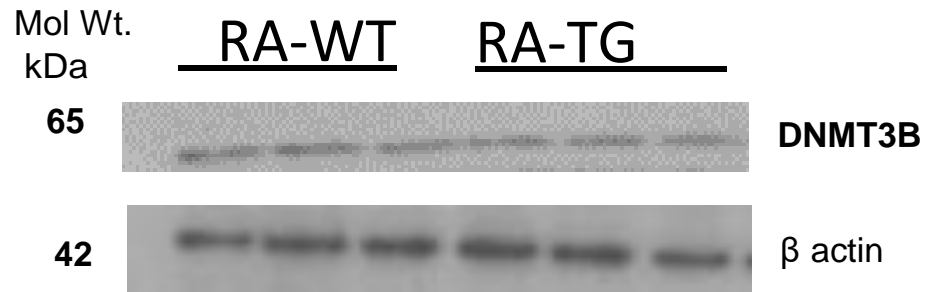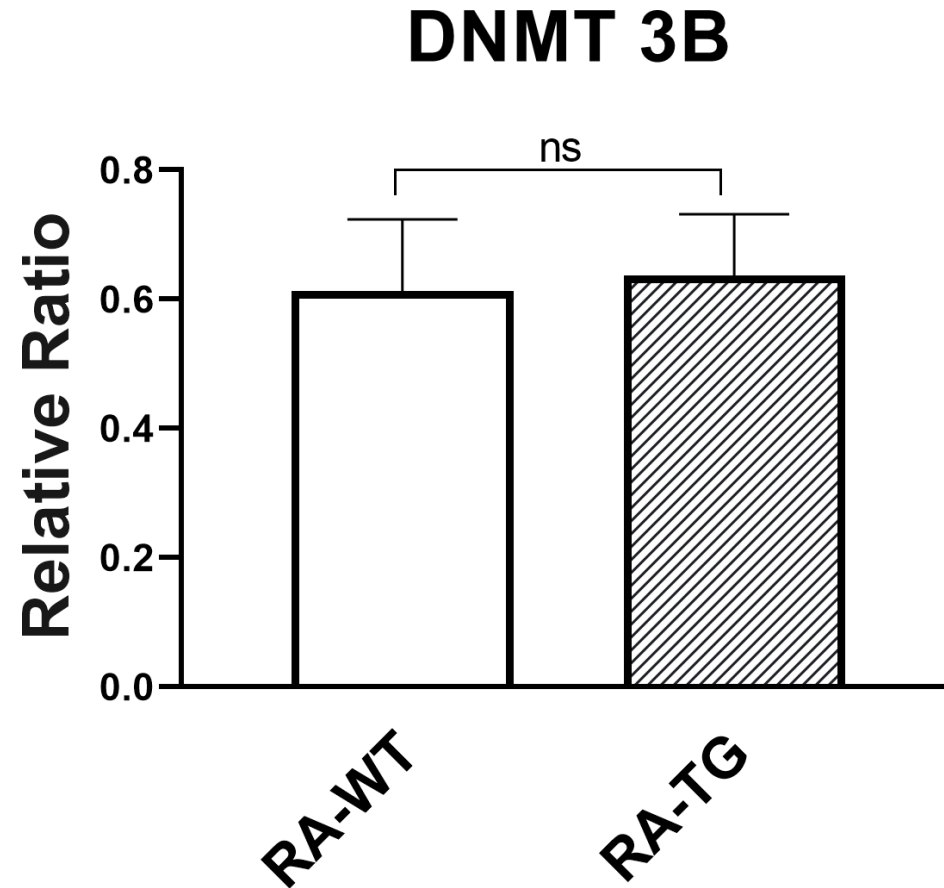

# Supplement # 3F

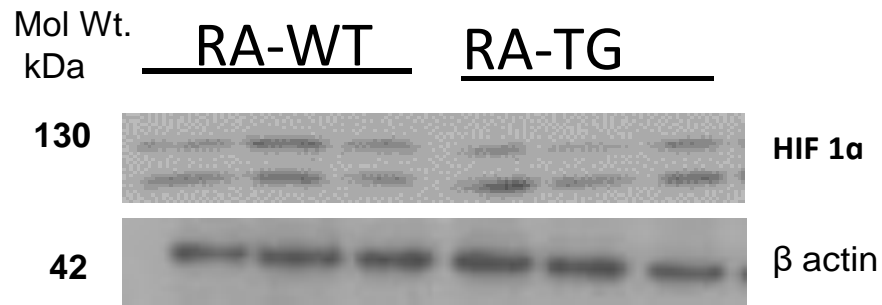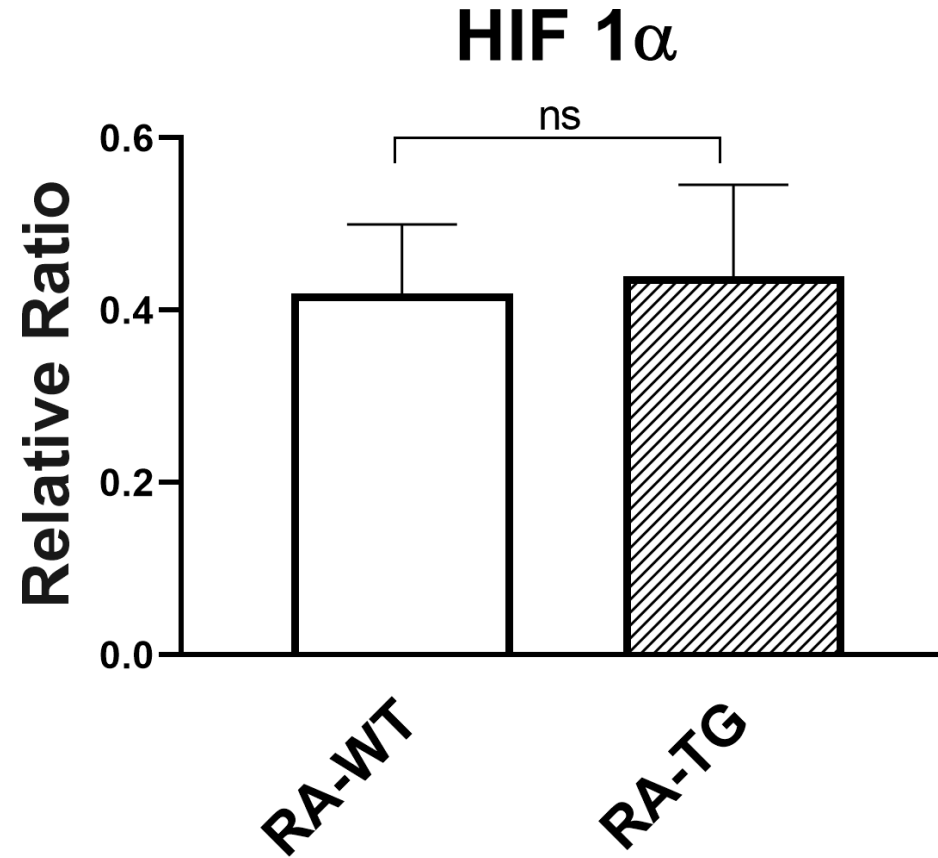



# Supplement # 3G

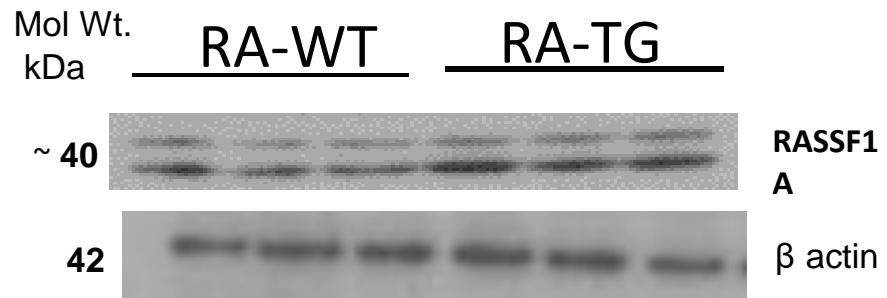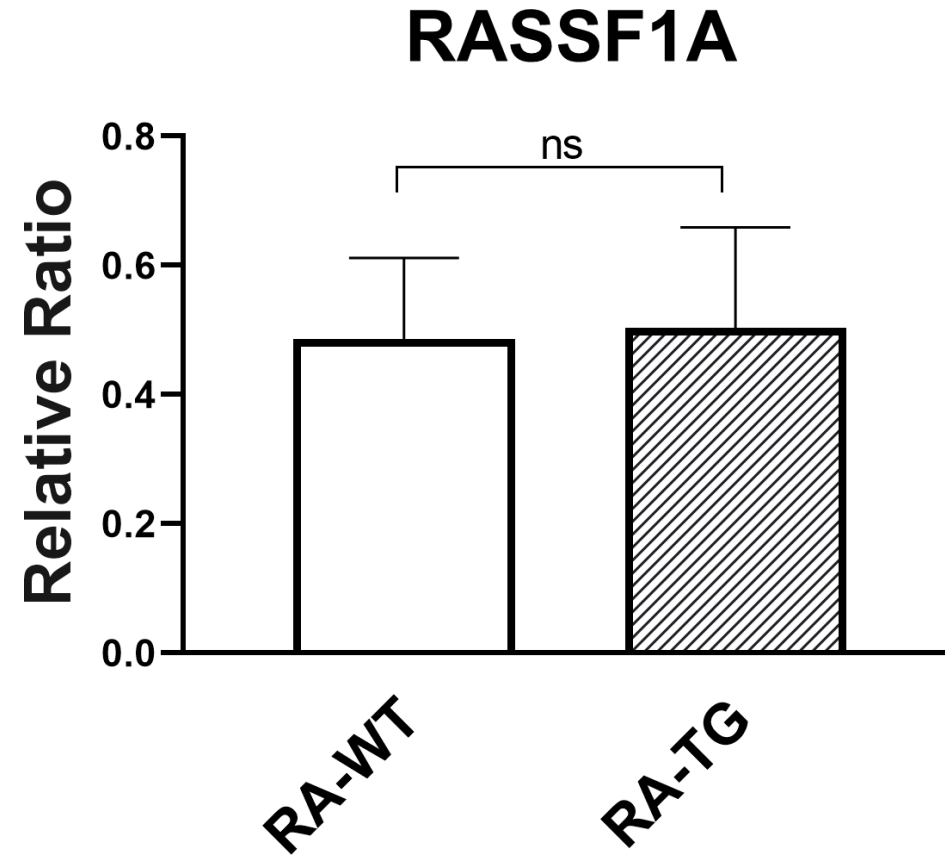

# Supplement # 3H

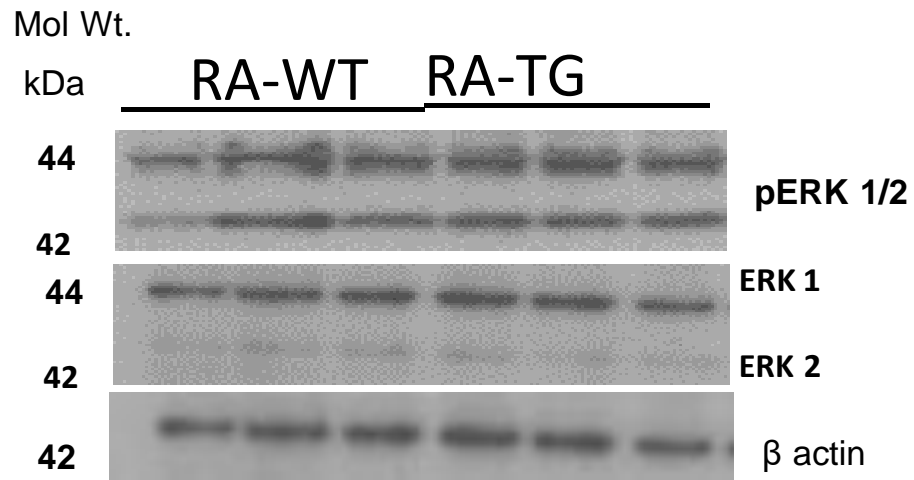

## Phosphorylated ERK 1/2

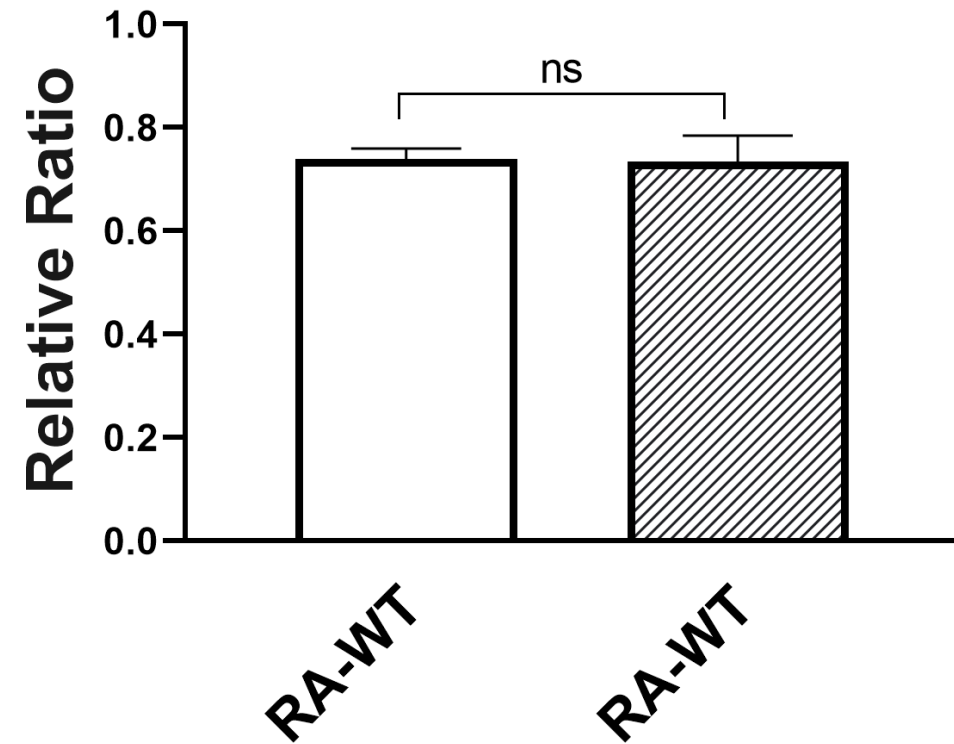

Supplement: Data_Sheet_1.pdf [file Data_Sheet_1.pdf]
